# Supplementary material for: Tribe Acalyptaini (Hemiptera: Tingidae: Tinginae) Revisited: Can Apomorphies in Secondary and Tertiary Structures of 18S rRNA Length-Variable Regions (LVRs) Support Tribe Validity?
Source: MDPI journal article supplement (doi:10.3390/insects14070600), 2023-07-03
Supplement: s1 [file s1]

Table S1. List of specimens used in the phylogenetic analysis, their geographic origin (if provided), GenBank accession numbers, and the sources for the sequences downloaded from GenBank.

| Infraorder   | Superfamily | Family                      | Species/subspecies                                  | Geographic origin<br>(year collected, if<br>originally<br>provided) | GenBank<br>accession<br>numbers<br>for 18S<br>rDNA | Source                                            |
|--------------|-------------|-----------------------------|-----------------------------------------------------|---------------------------------------------------------------------|----------------------------------------------------|---------------------------------------------------|
| Ingroup      |             |                             |                                                     |                                                                     |                                                    |                                                   |
| Cimicomorpha | Miroidea    | Tingidae:<br>Tinginae       | <i>Acalypta miyamotoi</i> Takeya, 1962              | Japan (2011)                                                        | OR022068                                           | present study                                     |
|              |             |                             | <i>Acalypta sauteri</i> Drake, 1942                 | Japan (2011)                                                        | OR022069                                           | present study                                     |
|              |             |                             | <i>Copium clavicorne</i> (Linnaeus, 1758)           | Ukraine (2010)                                                      | OR022071                                           | present study                                     |
|              |             |                             | <i>Corythucha ciliata</i> (Say, 1832)               | China                                                               | KJ461201                                           | [45]                                              |
|              |             |                             | <i>Derephysia foliacea</i> (Fallén, 1807)           | Poland (2010)                                                       | OR022072                                           | present study                                     |
|              |             |                             | <i>Dictyonota strichnocera</i> Fieber, 1844         | Slovakia (2011)                                                     | OR022074                                           | present study                                     |
|              |             |                             | <i>Dictyla humuli</i> (Fabiricius, 1794)            | Poland (2010)                                                       | OR022073                                           | present study                                     |
|              |             |                             | <i>Kalama tricornis</i> (Schränk, 1801)             | Poland (2008)                                                       | OR022075                                           | present study                                     |
|              |             |                             | <i>Lasiacantha capucina capucina</i> (Germar, 1837) | Poland (2010)                                                       | OR022076                                           | present study                                     |
|              |             |                             | <i>Metasalis populi</i> (Takeya, 1932)              | China                                                               | KJ461270                                           | [45]                                              |
|              |             |                             | <i>Nobarnus signatus</i> (Distant, 1920)            | New Caledonia<br>(2008)                                             | OR022077                                           | present study                                     |
|              |             |                             | <i>Oncochila scapularis</i> (Fieber, 1844)          | Poland (2010)                                                       | OR022078                                           | present study                                     |
|              |             |                             | <i>Physatocheila fieberi</i> (Scott, 1874)          | Japan (2011)                                                        | OR022079                                           | present study                                     |
|              |             |                             | <i>Pseudacysta perseae</i> (Heidemmann, 1908)       | French Guiana                                                       | KM278220                                           | [direct submission<br>to GenBank,<br>unpublished] |
|              |             |                             | <i>Stephanitis nashi nashi</i> Esaki & Takeya, 1931 | Japan (2011)                                                        | OR022081                                           | present study                                     |
|              |             |                             | <i>Stephanitis takeyai</i> Drake & Maa, 1955        | Japan (2011)                                                        | OR022082                                           | present study                                     |
|              |             |                             | <i>Tingis matsumurai</i> Takeya, 1962               | Japan (2011)                                                        | OR022083                                           | present study                                     |
|              |             | Tingidae:<br>Cantacaderinae | <i>Cantacader lethierryi</i> Scott, 1874            | Japan (2011)                                                        | OR022070                                           | present study                                     |
|              |             |                             | <i>Pseudophatnoma laosana</i> B. Lis, 1999          | Thailand (2013)                                                     | OR022080                                           | present study                                     |
| Outgroup     |             |                             |                                                     |                                                                     |                                                    |                                                   |
| Cimicomorpha | Miroidea    | Miridae                     | <i>Adelphocoris lineolatus</i> (Goeze, 1778)        | China                                                               | KJ461200                                           | [45]                                              |
|              |             |                             | <i>Lygus hesperus</i> Knight, 1917                  | USA (1993)                                                          | U06476                                             | [46]                                              |
|              | Naboidea    | Nabidae                     | <i>Nabis sinicus</i> (Hsiao, 1964)                  | China                                                               | KJ461288                                           | [45]                                              |
