# Supplementary material for: Tribe Acalyptaini (Hemiptera: Tingidae: Tinginae) Revisited: Can Apomorphies in Secondary and Tertiary Structures of 18S rRNA Length-Variable Regions (LVRs) Support Tribe Validity?
Source: MDPI journal article supplement (doi:10.3390/insects14070600), 2023-07-03
Supplement: s1 [file s1]

Table S2. List of specimens with 18S rDNA used for extraction and amplification during the present study. Their geographic origin, GenBank accession numbers, University of Opole sample numbers, and names of the persons who provided the specimens for analyses are provided. All newly sequenced specimens were identified to species by the first author (BAL). Acronyms for the persons who collected or/and provided the specimens for analyses are, as follows: AW (Andrzej Wolski, Institute of Biology, University of Opole, Opole, Poland), BL (Barbara Lis, Institute of Biology, University of Opole, Opole, Poland), MM (Miłosz Mazur, Institute of Biology, University of Opole, Opole, Poland), SK (Shin-ichi Kudo, Department of Biology, Naruto University of Education, Naruto, Tokushima, Japan).

| Family   | Subfamily      | Tribe         | Species/subspecies                                  | Geographic origin<br>(year collected, if<br>originally provided) | GenBank<br>accession<br>numbers for<br>18S rDNA | University of Opole<br>sample numbers for<br>newly sequenced<br>species (person who<br>provided the<br>specimen) |
|----------|----------------|---------------|-----------------------------------------------------|------------------------------------------------------------------|-------------------------------------------------|------------------------------------------------------------------------------------------------------------------|
| Tingidae | Tinginae       | Acalyptaini   | <i>Acalypta miyamotoi</i> Takeya, 1962              | Japan (2011)                                                     | OR022068                                        | T47 (SK)                                                                                                         |
|          |                |               | <i>Acalypta sauteri</i> Drake, 1942                 | Japan (2011)                                                     | OR022069                                        | T48 (SK)                                                                                                         |
|          |                |               | <i>Derephysia foliacea</i> (Fallén, 1807)           | Poland (2010)                                                    | OR022072                                        | T48 (BL)                                                                                                         |
|          |                |               | <i>Dictyonota strichnocera</i> Fieber, 1844         | Slovakia (2011)                                                  | OR022074                                        | DS2 (MM)                                                                                                         |
|          |                |               | <i>Kalama tricornis</i> (Schränk, 1801)             | Poland (2008)                                                    | OR022075                                        | T3 (BL)                                                                                                          |
|          |                |               | <i>Recaredu rex</i> Distant, 1909                   | Ghana (1965)                                                     | Extraction and<br>amplification<br>failed.      | RR63                                                                                                             |
|          |                | Litadeini     | <i>Nobarnus signatus</i> (Distant, 1920)            | New Caledonia (2008)                                             | OR022077                                        | T10                                                                                                              |
|          |                | Tingini       | <i>Copium clavicorne</i> (Linnaeus, 1758)           | Ukraine (2010)                                                   | OR022071                                        | T33 (MM)                                                                                                         |
|          |                |               | <i>Dictyla humuli</i> (Fabricius, 1794)             | Poland (2010)                                                    | OR022073                                        | T42 (BL)                                                                                                         |
|          |                |               | <i>Lasiacantha capucina capucina</i> (Germar, 1837) | Poland (2010)                                                    | OR022076                                        | T38 (BL)                                                                                                         |
|          |                |               | <i>Oncochila scapularis</i> (Fieber, 1844)          | Poland (2010)                                                    | OR022078                                        | T39 (BL)                                                                                                         |
|          |                |               | <i>Physatocheila fieberi</i> (Scott, 1874)          | Japan (2011)                                                     | OR022079                                        | T54 (SK)                                                                                                         |
|          |                |               | <i>Stephanitis nashi nashi</i> Esaki & Takeya, 1931 | Japan (2011)                                                     | OR022081                                        | T49 (SK)                                                                                                         |
|          |                |               | <i>Stephanitis takeyai</i> Drake & Maa, 1955        | Japan (2011)                                                     | OR022082                                        | T51 (SK)                                                                                                         |
|          |                |               | <i>Tingis matsumurai</i> Takeya, 1962               | Japan (2011)                                                     | OR022083                                        | T52 (SK)                                                                                                         |
|          | Cantacaderinae | Cantacaderini | <i>Cantacader lethierryi</i> Scott, 1874            | Japan (2011)                                                     | OR022070                                        | T46 (SK)                                                                                                         |
|          |                |               | <i>Pseudophatnoma laosana</i> B. Lis, 1999          | Thailand (2013)                                                  | OR022080                                        | T59 (AW)                                                                                                         |
