# Supplementary material for: Tribe Acalyptaini (Hemiptera: Tingidae: Tinginae) Revisited: Can Apomorphies in Secondary and Tertiary Structures of 18S rRNA Length-Variable Regions (LVRs) Support Tribe Validity?
Source: MDPI journal article supplement (doi:10.3390/insects14070600), 2023-07-03
Supplement: s1 [file s1]

**Table S3.** Primers used for PCR amplification and sequencing of the nuclear 18S rDNA gene.

|                           | Primers | Sequence (5'→3')               | Source  |
|---------------------------|---------|--------------------------------|---------|
| <b>1st set of primers</b> | 1F      | TAC CTG GTT GAT CCT GCC AGT AG | [18]    |
|                           | 5R      | CTT GGC AAA TGC TTT CGC        | [18]    |
|                           | 3F      | GTT CGA TTC CGG AGA GGG A      | [18]    |
|                           | 18Sbi   | GAG TCT CGT TCG TTA TCG GA     | [19]    |
|                           | 5F      | GCG AAA GCA TTT GCC AAG AA     | [18]    |
|                           | 9R      | GAT CCT TCC GCA GGT TCA CCT AC | [18]    |
| <b>2nd set of primers</b> | Ns1     | GTAGTCATATGCTTGTCTC            | [21–23] |
|                           | 18SP3   | GGTAGAACTAGGGCGGTATCT          | [20,22] |
|                           | 18SP5   | CAAGAACGAAAGTTAGAGGT           | [23]    |
|                           | Ns8     | TCCGCAGGTTACCTACGGA            | [21–23] |
