# Supplementary material for: Tribe Acalyptaini (Hemiptera: Tingidae: Tinginae) Revisited: Can Apomorphies in Secondary and Tertiary Structures of 18S rRNA Length-Variable Regions (LVRs) Support Tribe Validity?
Source: MDPI journal article supplement (doi:10.3390/insects14070600), 2023-07-03
Supplement: s1 [file s1]

File S2

The predicted secondary structure models of the 18S rRNA gene for analysed consensus species; for the explanation, see Figure 1. LVRs are indicated in red.

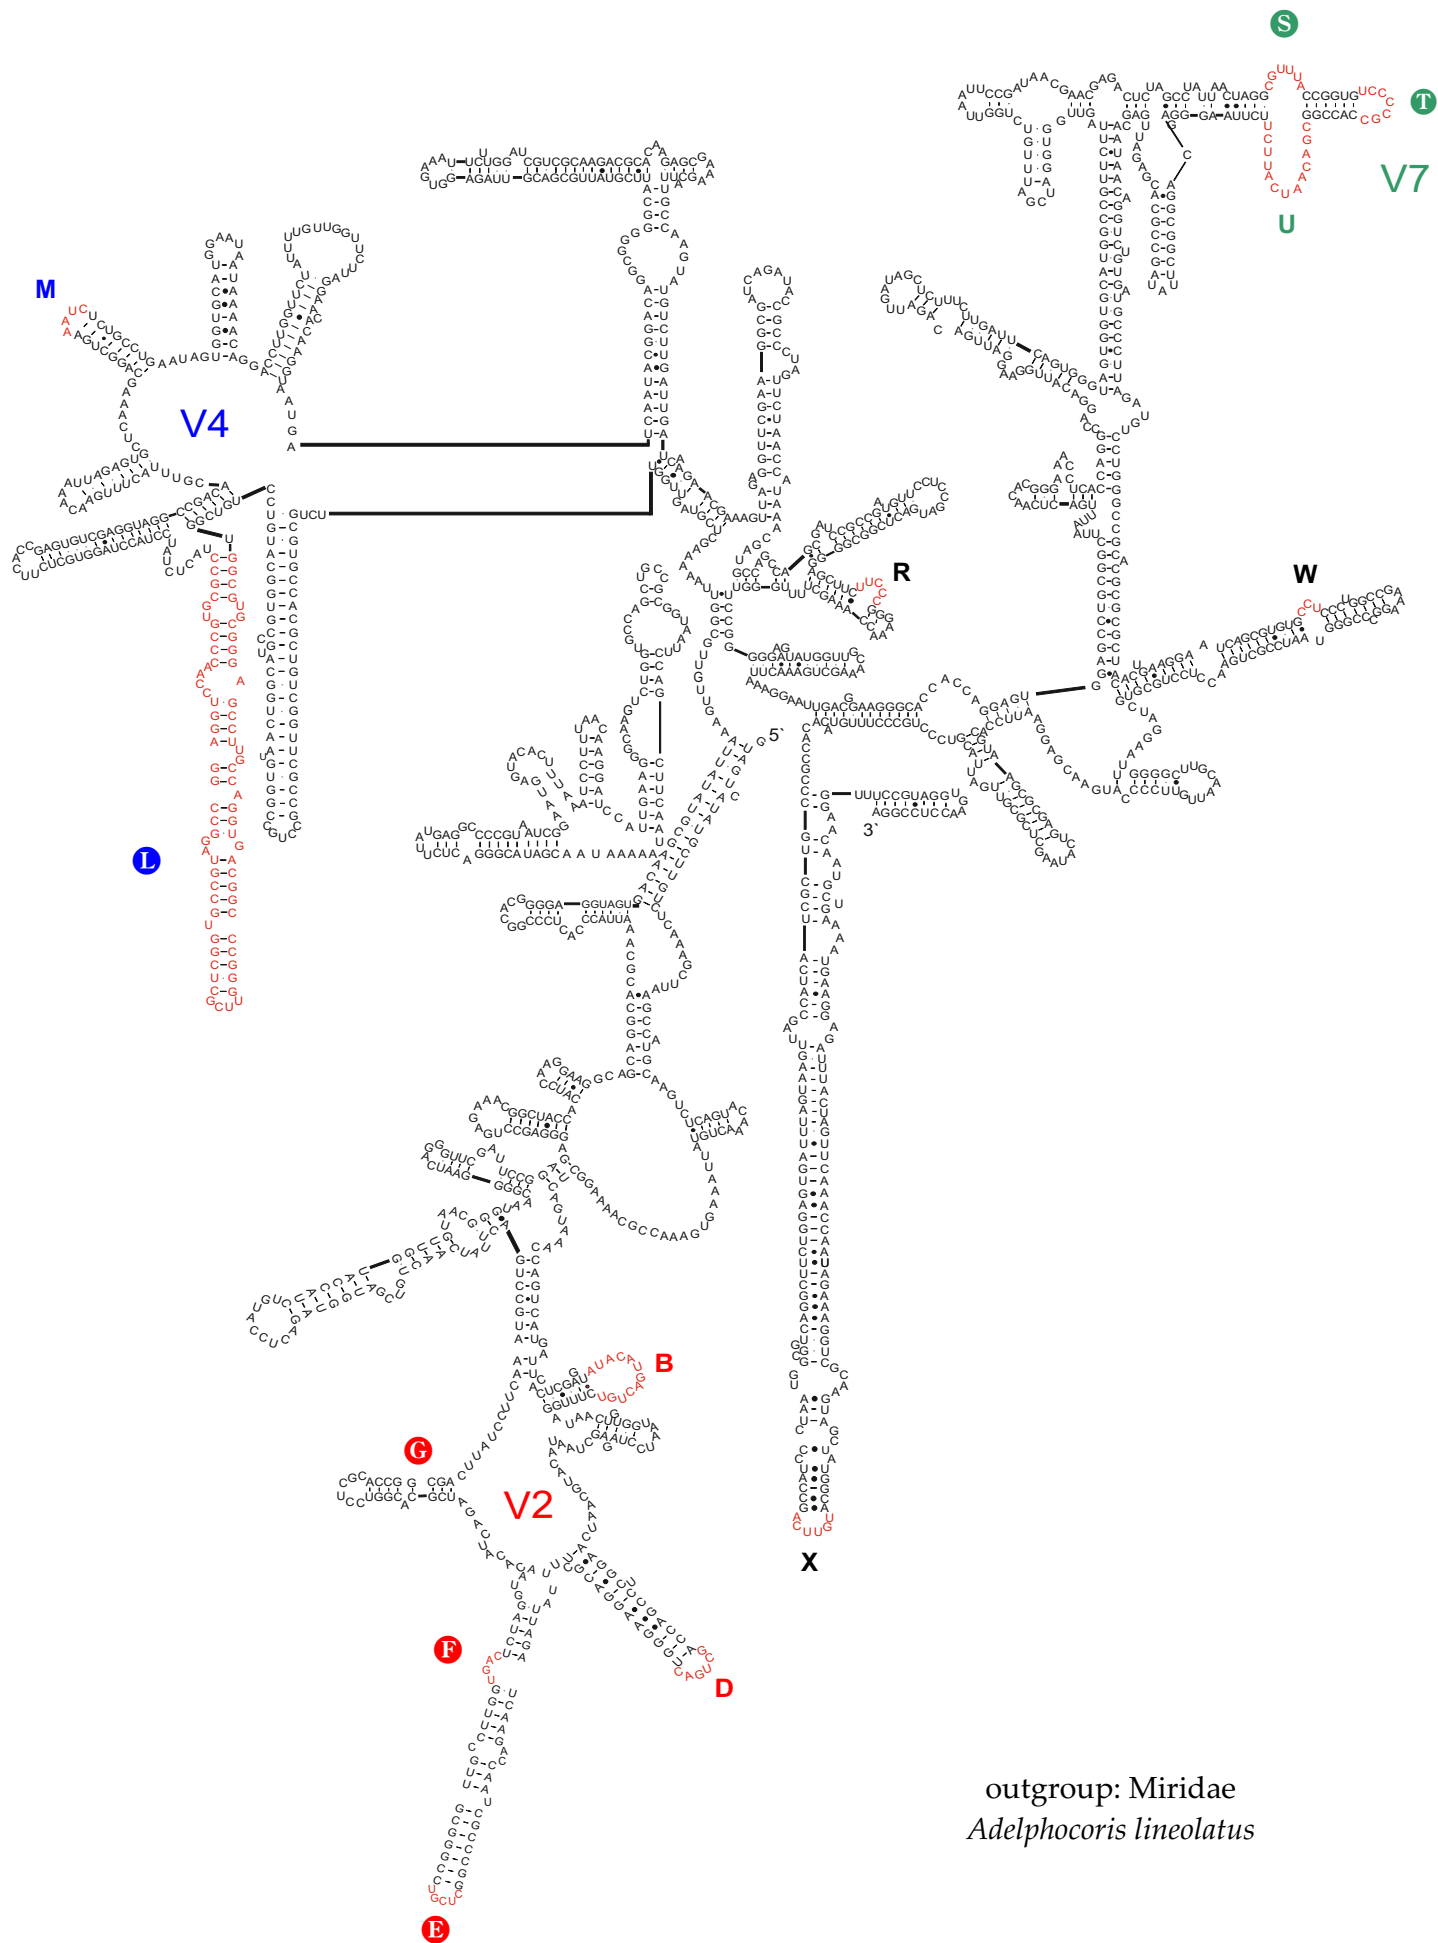

outgroup: Miridae  
*Adelphocoris lineolatus*

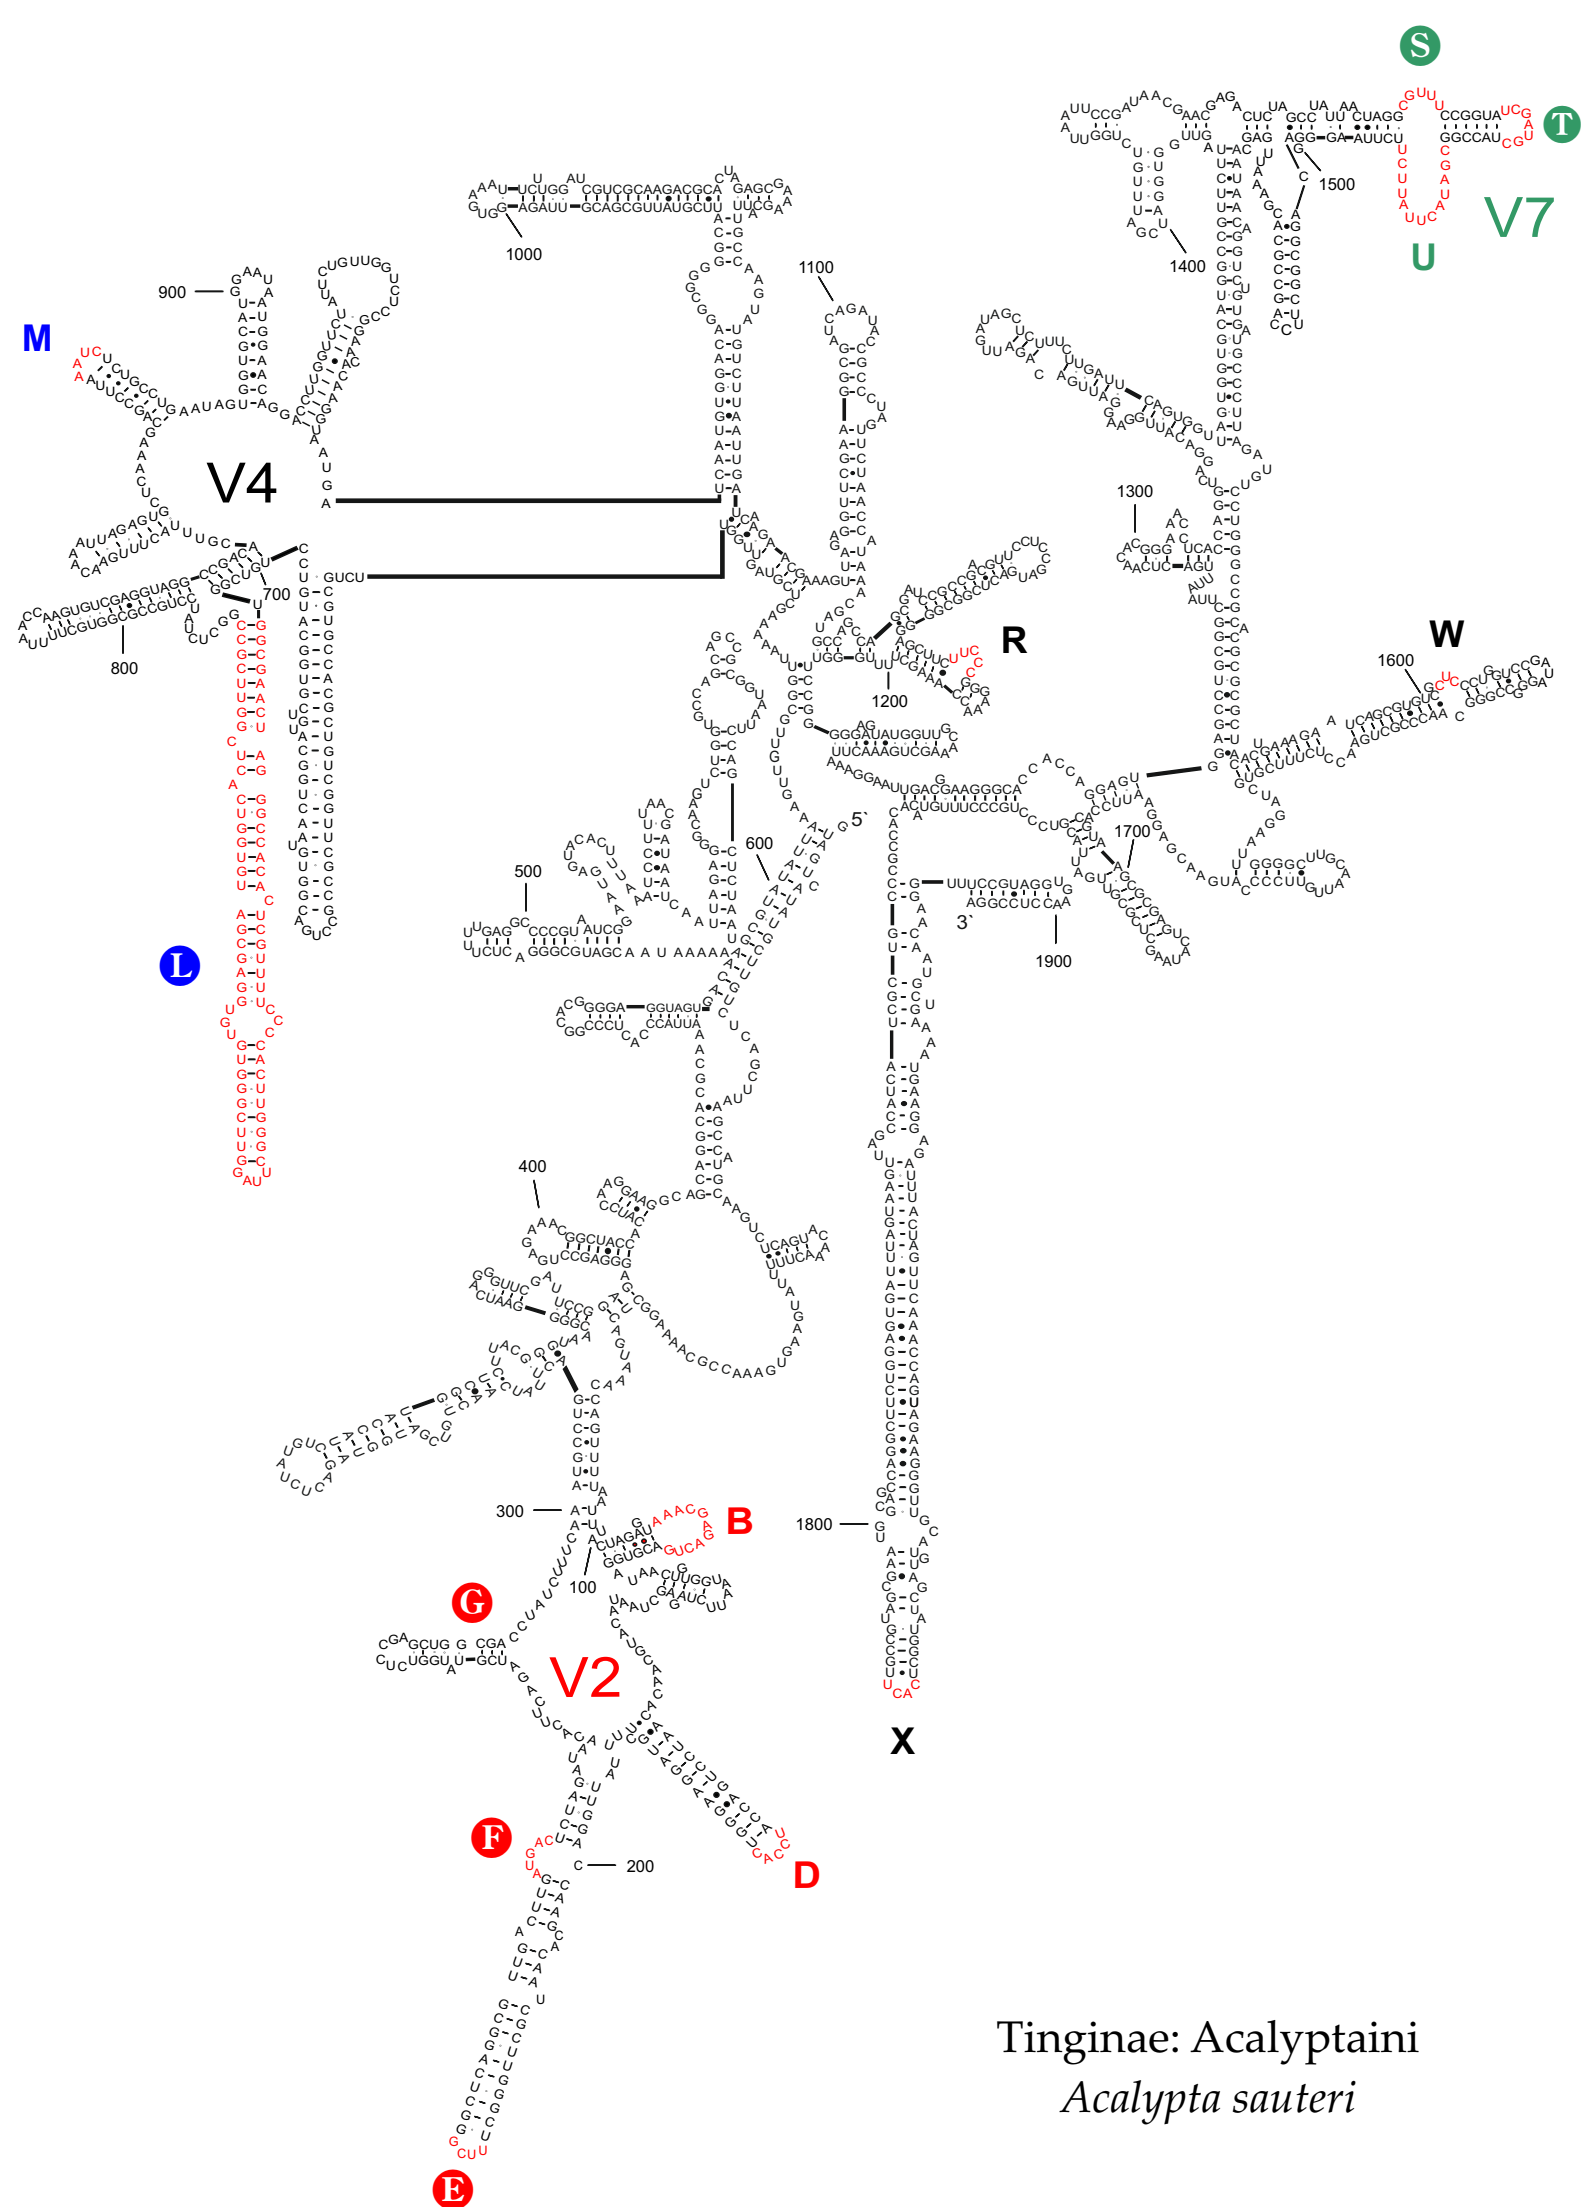

Tinginae: Acalyptaini  
*Acalypta sauteri*



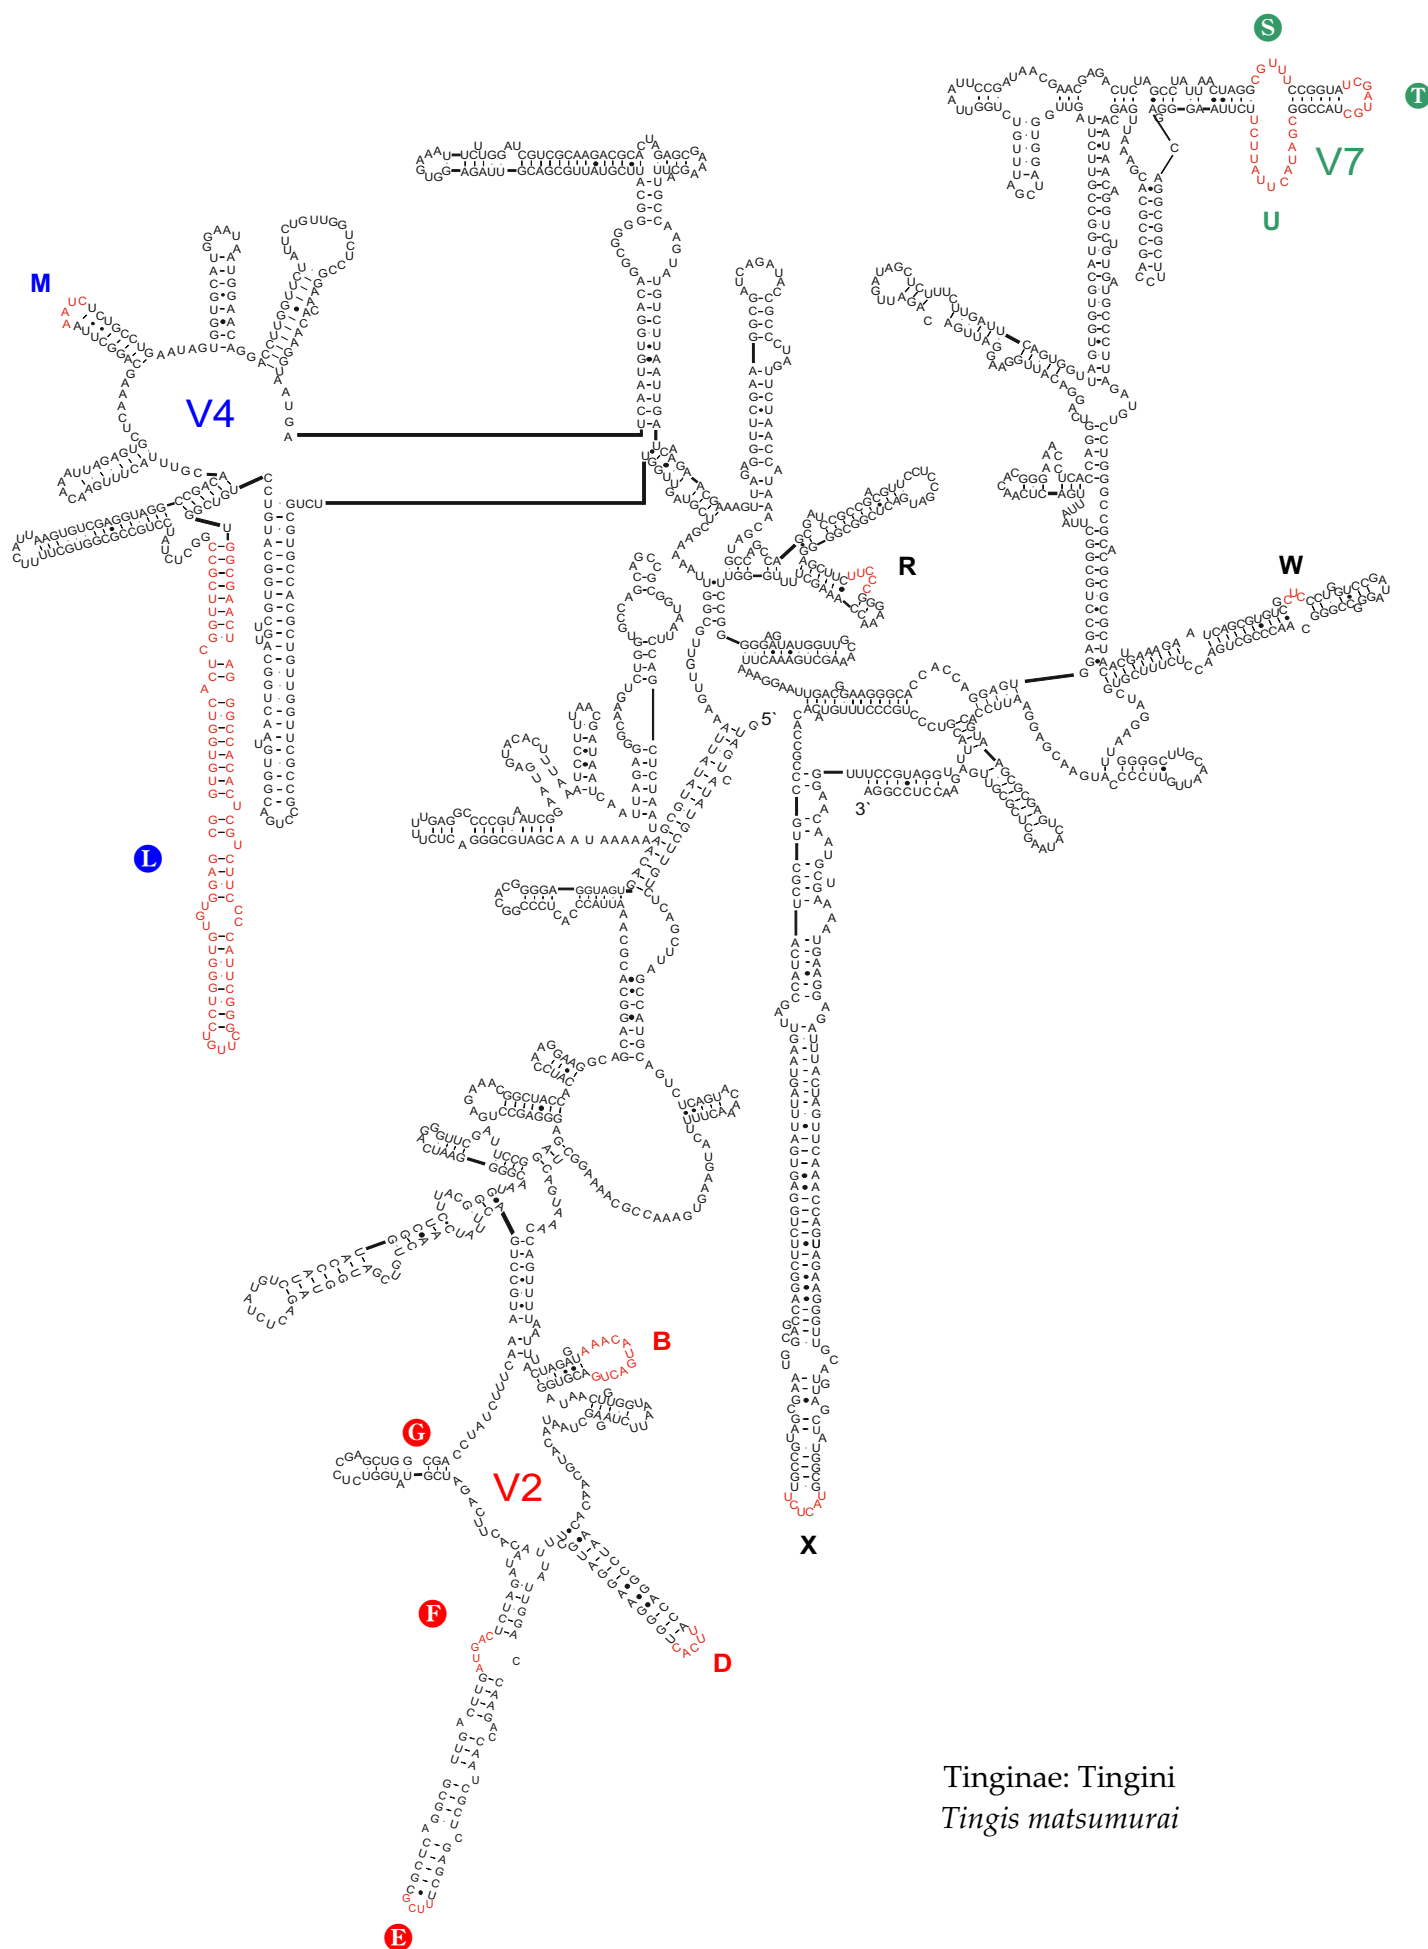

Tinginae: Tingini  
*Tingis matsumurai*

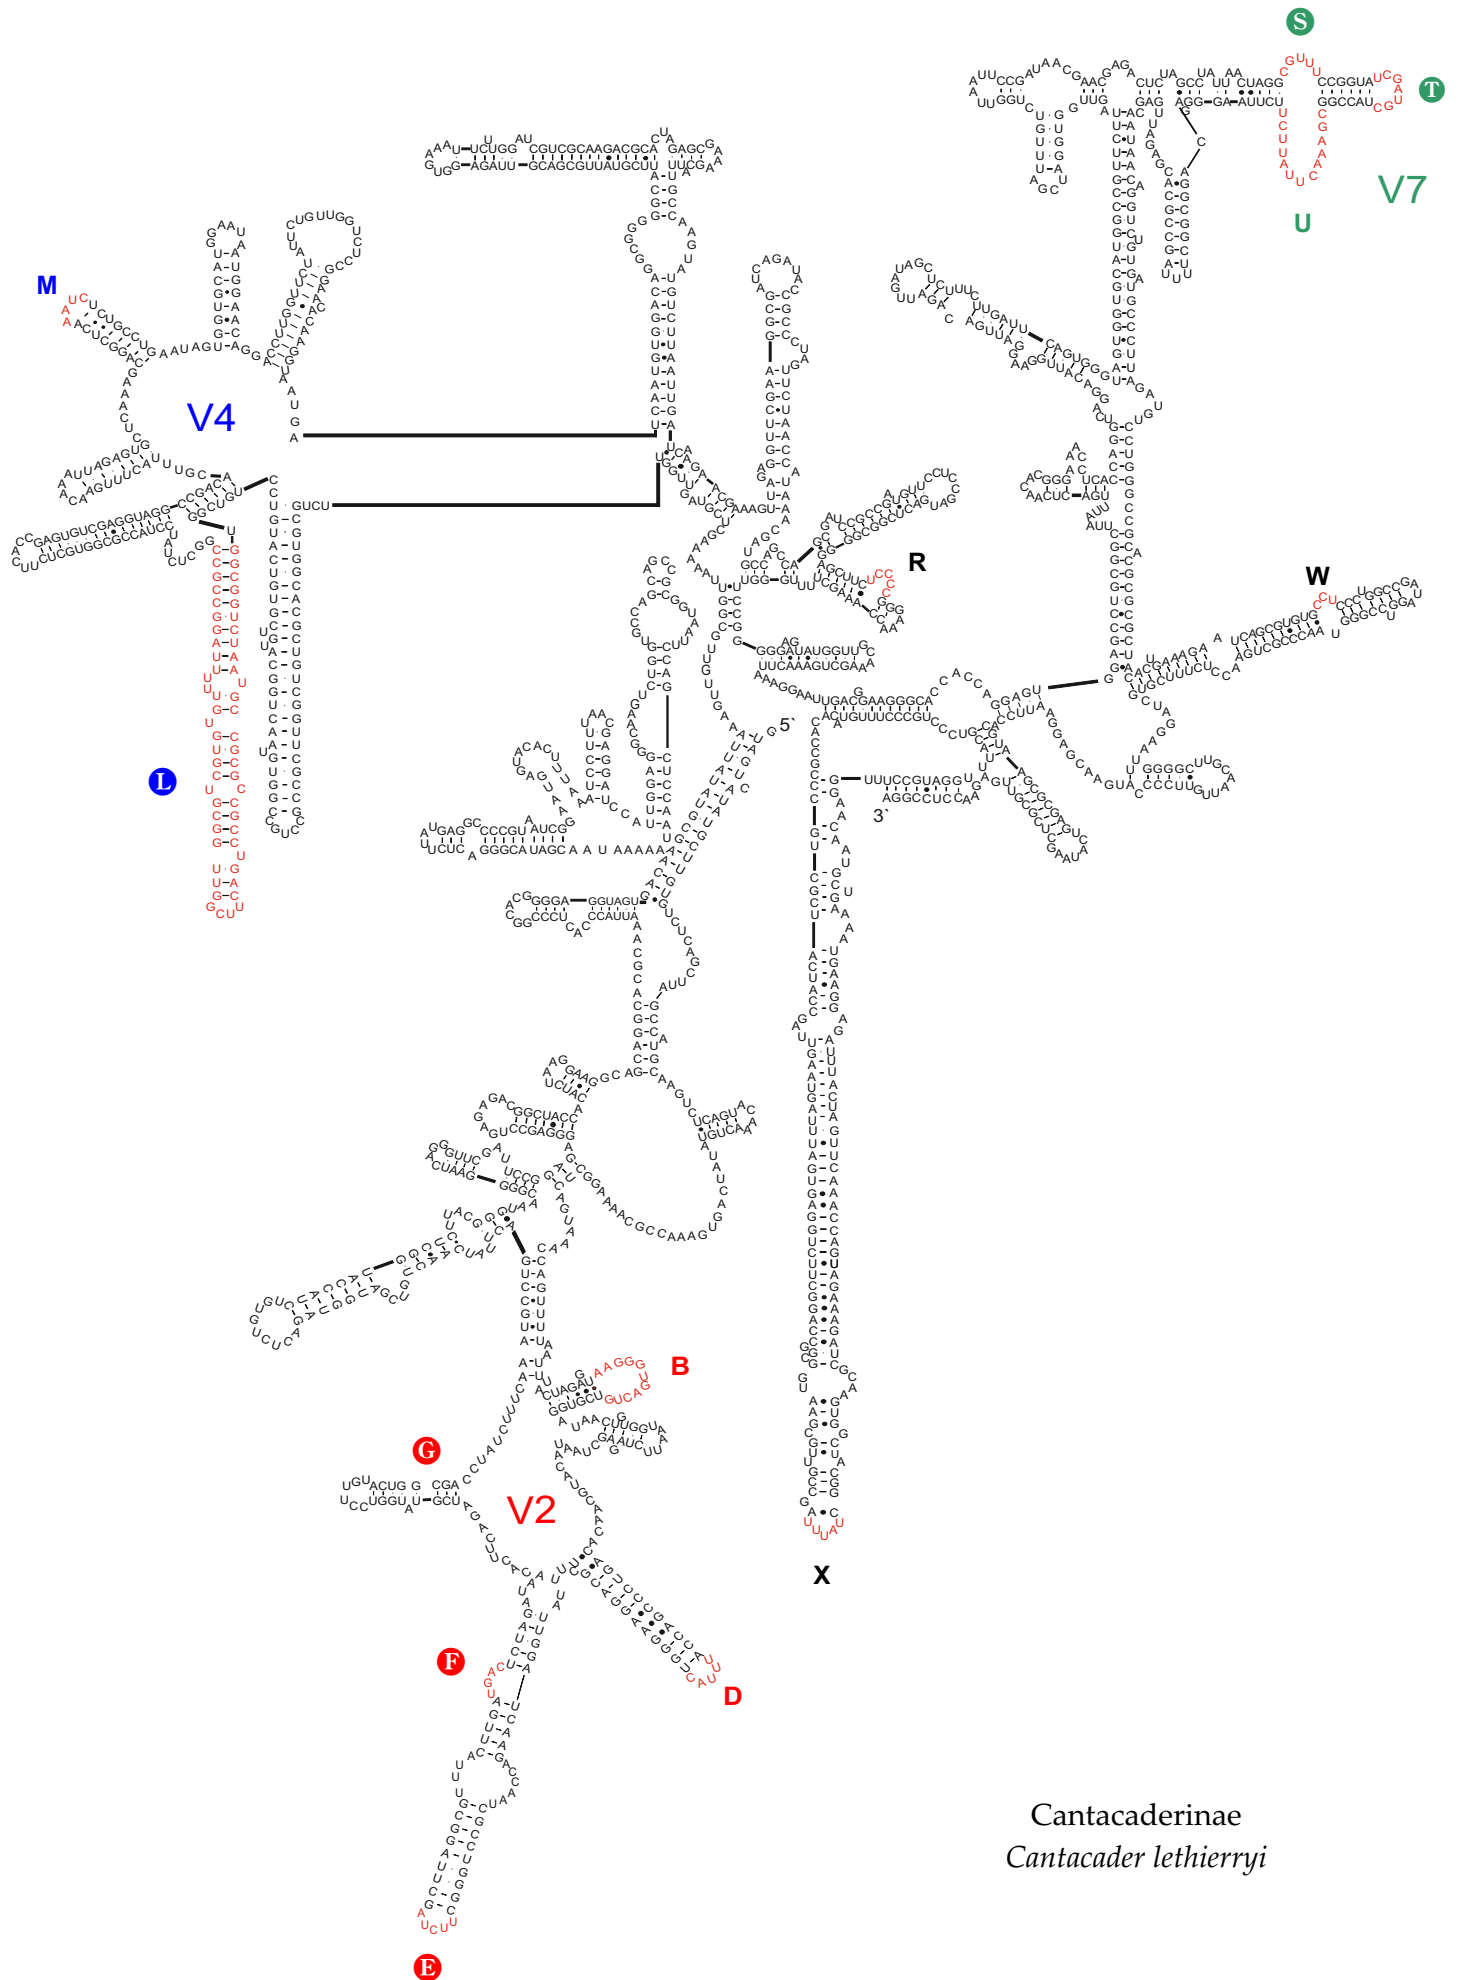

Cantacaderinae  
*Cantacader lethierryi*
